# Supplementary material for: The Diarylquinoline TMC207 for Multidrug-Resistant Tuberculosis
Source: Atypon-hosted journal article supplement (doi:10.1056/nejmoa0808427), 2009-06-03
Supplement: nejm_diacon_2397sa1.pdf [file nejm_diacon_2397sa1.pdf]

## Supplementary Appendix

This appendix has been provided by the authors to give readers additional information about their work.

Supplement to: Diacon AH, Pym A, Grobusch M, et al. The diarylquinoline TMC207 for multidrug-resistant tuberculosis. *N Engl J Med* 2009;360:2397-405.

The dosing of medications used to treat TB are shown in the table below:

**Supplemental Table 1. Drugs used in the Background Regimen for the treatment of MDR-TB**

| Background regimen drugs                      | Formulation           | Daily dosage (mg) |         | Phase<br>(intensive / continuation) |
|-----------------------------------------------|-----------------------|-------------------|---------|-------------------------------------|
|                                               |                       | Minimum           | Maximum |                                     |
| <b>Aminoglycosides</b>                        |                       |                   |         |                                     |
| Kanamycin <sup>a</sup>                        | Vial, 1g              | 750               | 1000    | Intensive                           |
| Amikacin <sup>a</sup>                         | Vial, 1g              | 750               | 1000    | Intensive                           |
| <b>Thioamides</b>                             |                       |                   |         |                                     |
| Ethionamide <sup>b,c</sup>                    | Tablet, 250 mg        | 500               | 750     | Intensive / continuation            |
| Prothionamide <sup>c</sup>                    | Tablet, 250 mg        | 500               | 1000    | Intensive / continuation            |
| <b>Pyrazinamide</b>                           | Tablet, 400 or 500 mg | 1200              | 1600    | Intensive                           |
| <b>Fluoroquinolones</b>                       |                       |                   |         |                                     |
| Ofloxacin <sup>d,e</sup>                      | Tablet, 200 mg        | 600               | 800     | Intensive / continuation            |
| Ciprofloxacin <sup>e</sup>                    | Tablet, 250 mg        | 1000              | 1500    | Intensive / continuation            |
| <b>Ethambutol<sup>f</sup></b>                 | Tablet, 400 mg        | 1000              | 1200    | Intensive / continuation            |
| <b>Terizidone / Cycloserine<sup>f,g</sup></b> | Capsule, 250 mg       | 500               | 750     | Intensive / continuation            |

<sup>a</sup> in case of unavailability of kanamycin due to drug supply issues, amikacin may be used.

<sup>b</sup> for reasons of intolerability (nausea), the dose may be split into 2 parts administered 10-12 hours apart, or the daily dose may be taken in the evening or may be taken with orange juice or milk or other liquid.

<sup>c</sup> in case of unavailability of ethionamide due to drug supply issues, prothionamide may be used.

<sup>d</sup> for reasons of intolerability, the dose may be reduced during the continuation phase.

<sup>e</sup> in case of unavailability of ofloxacin due to drug supply issues, ciprofloxacin may be used.

<sup>f</sup> in case of intolerance to terizidone / cycloserine and if there is no resistance to ethambutol as determined by drug susceptibility testing, ethambutol may be substituted for terizidone / cycloserine.

<sup>g</sup> to reduce CNS effects, 150 mg/day of pyridoxine may be administered.
